# Supplementary material for: Hydrophobic hydrogel caged H3PO4 as a new class of high-temperature proton exchange membranes with enhanced acid retention
Source: Royal Society of Chemistry journal article supplement (doi:10.1039/c3ra21417f), 2013-01-01
Supplement: c3ra21417f.pdf [file c3ra21417f.pdf]

## Hydrophobic Hydrogels caged $\text{H}_3\text{PO}_4$ as a New Class of High-Temperature Proton Exchange Membranes with Enhanced Acid Retention

Qunwei Tang<sup>a</sup>, Guoqing Qian<sup>b</sup>, Kevin Huang<sup>a\*</sup>

<sup>a</sup> Department of Mechanical Engineering, University of South Carolina, Columbia, SC29201, United States;

<sup>b</sup> Department of Chemistry, University of South Carolina, Columbia, SC29208, United States;

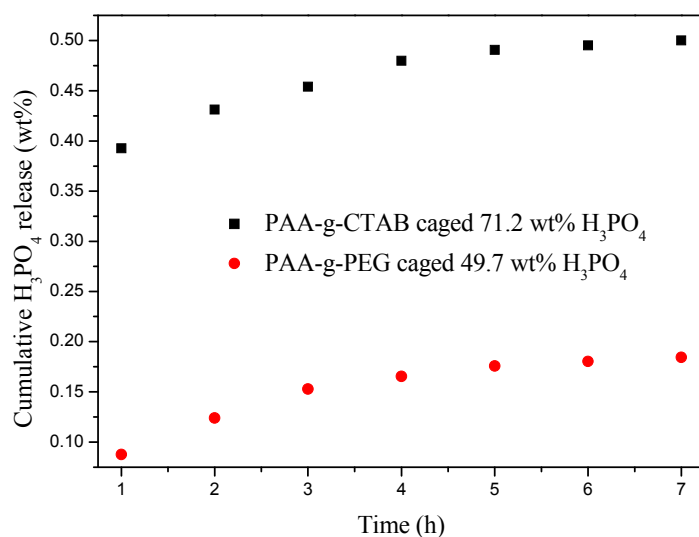

**Fig. S1** Cumulative release of  $\text{H}_3\text{PO}_4$  from PAA-g-CTAB caged 71.2 wt%  $\text{H}_3\text{PO}_4$  and PAA-g-PEG caged 49.7 wt%  $\text{H}_3\text{PO}_4$  membranes.
